# Supplementary material
Source: ML conference proceedings conference paper supplement (https://proceedings.neurips.cc/paper_files/paper/2014/hash/e816c635cad85a60fabd6b97b03cbcc9-Abstract.html)
Supplement: Supplementary file [file e816c635cad85a60fabd6b97b03cbcc9-Supplemental.zip]

## Supplementary material

### Proof of Theorem 2.1

Algorithm SIMPLEHC correctly reconstructs the graph  $G$  if for every edge  $e = \{i, j\}$  not in  $E(G)$ , at least one observed independent set vector  $\sigma^{(k)}$  contains both  $i$  and  $j$ . Let  $A_{ij}^k = \{\sigma_i^{(k)} = 0 \text{ or } \sigma_j^{(k)} = 0\}$  be the event that at least one of  $i$  or  $j$  is missing from  $\sigma^{(k)}$ , and let  $A_{ij} = \cap_{k=1}^n A_{ij}^k$ . We have by the union bound and independence of  $A_{ij}^k$  for different  $k$ ,

$$\mathbb{P}(\text{error}) \leq \mathbb{P}\left(\bigcup_{(i,j) \in E^c} A_{ij}\right) \leq \binom{p}{2} \mathbb{P}(\cap_{k=1}^n A_{ij}^k) = \binom{p}{2} \mathbb{P}(A_{ij}^1)^n \leq \binom{p}{2} (1 - \gamma)^n.$$

The last inequality is from Lemma 2.3, with the value of  $\gamma$  the quantity in the statement of the Lemma. To make  $\mathbb{P}(\text{error})$  approach zero at the rate  $1/p$  it suffices to take  $n = 3\gamma^{-1} \log p$ . This proves the theorem.  $\square$

### Proof of Theorem 2.2

Consider the set of graphs  $\mathcal{G}_m$  obtained by taking an arbitrary graph on  $m$  nodes with maximum degree  $d$ , and to each vertex  $v$  adding  $d$  nodes  $u_1, \dots, u_d$  with edges  $\{v, u_i\}$ . The total number of nodes is  $p = m(d+1)$ . Thus we are working with the set of graphs consisting of  $m = p/(d+1)$  stars of degree  $d$ , with all remaining edges going between centers of stars.

The goal is to determine the correct subset of the  $\binom{m}{2}$  remaining edges. Fix a constant  $c > 0$  and consider any graph  $G \in \mathcal{G}_m$  missing at least  $cm$  edges. Note that such graphs consist of almost all of  $\mathcal{G}_m$  (a proportion  $1 - o(1)$ ).

We bound the number of samples required by the maximum-likelihood (ML) rule (equivalent to algorithm SIMPLEHC) to reconstruct  $G$ . As observed in Section 2, the ML graph contains the edge  $e = \{i, j\}$  between star centers  $i$  and  $j$  if and only if none of the sets  $\sigma^{(1)}, \sigma^{(2)}, \dots, \sigma^{(n)}$  contains both  $i$  and  $j$ . Thus, in order for ML to give the correct graph, for each missing edge  $e = \{i, j\}$  it is necessary to observe a “witness”  $\sigma^{(k)}$  with  $\sigma_i^{(k)} = \sigma_j^{(k)} = 1$ .

We proceed by upper bounding the probability of observing a witness for each of the  $cm$  missing edges. Each star center  $i$  is included in a particular random independent set  $\sigma^{(k)}$  with probability at most

$$q = \frac{1}{2 \cdot (2\lambda)^d},$$

hence  $\sigma^{(k)}$  is a witness for missing edge  $\{i, j\}$  with probability at most  $q^2$ . Hence the expected number of missing edges which within  $n$  samples have no witness is at least  $cm(1 - q^2)^n$ , and a second moment argument shows that one must take

$$n \geq (1 + o(1)) \frac{\log m}{-\log(1 - q^2)} = \Omega((2\lambda)^{2d} \log m),$$

where we used the fact that  $-\log(1 - q^2) = q^2 + o(q^4)$  and  $q^{-1} = (2\lambda)^d$ .  $\square$

### Proof of Lemma 2.3

We can decompose the partition function as

$$\begin{aligned} Z_G &= \sum_I \lambda^{|I|} = \sum_{I \in S_{\emptyset, \emptyset}} \lambda^{|I|} + \sum_{I \in S_{\emptyset, j}} \lambda^{|I|} + \sum_{I \in S_{i, \emptyset}} \lambda^{|I|} + \sum_{I \in S_{i, j}} \lambda^{|I|} \\ &:= Z_{\emptyset, \emptyset} + Z_{\emptyset, j} + Z_{i, \emptyset} + Z_{i, j}, \end{aligned} \quad (4.4)$$

where  $S_{ij} = \{I : i, j \in I\}$ ,  $S_{i, \emptyset} = \{I : i \in I, j \notin I\}$ , etc. Now,  $Z_G$  and  $Z_{G+e}$  are the same except  $Z_{G+e}$  does not have the last term  $Z_{i, j}$ . We bound the last term by first noting that

$$|S_{i, j}| \cdot 2^d \geq |S_{\emptyset, j}|. \quad (4.5)$$

This is because for each independent set  $I$  with  $i \in I$ , there are at most  $2^d$  distinct independent sets  $I'$  with  $i \notin I'$  with some subset of (at most  $d$ ) neighbors of  $i$  included. One way of observing this is defining the map  $f : S_{\emptyset,j} \rightarrow S_{i,j}$  by  $I \mapsto \{i\} \cup I \setminus \mathcal{N}(i)$ . The map  $f$  takes at most  $2^d$  sets  $I' \in S_{\emptyset,j}$  to each  $I \in S_{i,j}$ , which implies (4.5).

Now, each such set  $I'$  mapping to  $I$  has weight at most a factor  $\lambda^{d-1}$  larger than  $I$ , so

$$2^d \lambda^{d-1} Z_{i,j} \geq Z_{\emptyset,j}. \quad (4.6)$$

Similar reasoning gives

$$2^d \lambda^{d-1} Z_{i,j} \geq Z_{i,\emptyset}, \quad \text{and} \quad 2^{2d} \lambda^{2d-2} Z_{i,j} \geq Z_{\emptyset,\emptyset}. \quad (4.7)$$

Using these estimates, we obtain

$$\mathbb{P}(\{i,j\} \subseteq I) = \frac{\sum_{I:\{i,j\} \subseteq I} \lambda^{|I|}}{\sum_I \lambda^{|I|}} = \frac{Z_{i,j}}{Z} \geq \frac{1}{1 + 4 \cdot (2\lambda)^{d-1} + 4 \cdot (2\lambda)^{2d-2}},$$

proving the lemma.  $\square$

### Proof of Lemma 3.2

We start by defining restricted partition function summations: Let

$$\begin{aligned} S_{ab} &= \{\sigma \in \{0,1\}^p : \sigma_a = \sigma_b = 1\}, \\ S_{a\emptyset} &= \{\sigma \in \{0,1\}^p : \sigma_a = 1, \sigma_b = 0\}, \end{aligned}$$

and analogously for  $S_{\emptyset b}$  and  $S_{\emptyset\emptyset}$ . We then define  $Z_{ab} = \sum_{\sigma \in S_{ab}} \exp(H(\sigma))$  and again analogously for  $Z_{a\emptyset}, Z_{\emptyset b}, Z_{\emptyset\emptyset}$ .

We first prove case (i) of the lemma, in which we assume that  $(a,b) \notin E(G)$  and lower bound the probability

$$\mathbb{P}(\sigma_a = 1 | \sigma_b = 1) = \frac{Z_{ab}}{Z_{ab} + Z_{\emptyset b}}.$$

To this end, consider the map  $f : S_{\emptyset b} \rightarrow S_{ab}$  defined by taking a configuration  $\sigma$ , setting  $\sigma_i = 0$  for neighbors  $i \in N(a)$ , and then setting  $\sigma_a = 1$ . Since the assumption  $(a,b) \notin E(G)$  implies that  $\sigma_a = \sigma_b = 1$  is a valid assignment to these variables, the definition of  $f$  implies in particular that  $(f(\sigma))_b = 1$  if  $\sigma_b = 1$ , so indeed  $f(\sigma) \in S_{ab}$  for  $\sigma \in S_{\emptyset b}$ .

Now, at most  $2^{\deg(a)}$  sets are mapped by  $f$  to any one set (since the neighbors of  $a$  can be in any configuration), and for any  $\sigma \in S_{\emptyset b}$ ,  $\exp(H(f(\sigma))) \geq \exp(H(\sigma) - h(\deg(a) + 1))$ . This shows that  $2^{\deg(a)} \exp[h(\deg(a) + 1)] Z_{ab} \geq Z_{\emptyset b}$ , and proves part (i) of the lemma.

We now turn to case (ii), assuming that  $(a,b) \in E(G)$ . Consider the map  $g : S_{ab} \rightarrow S_{\emptyset b}$  taking  $\sigma \in S_{ab}$  and setting  $\sigma_a = 0$  (removing node  $a$  from the independent set). The map  $g$  is one-to-one, and  $H$  increases by  $\beta$  due to resolving the conflict on edge  $(a,b)$ , but decreases by  $h_a \leq h$  due to omitting node  $a$ :  $\exp(H(g(\sigma))) \geq \exp(H(\sigma) + \beta - h)$ . This shows that  $Z_{ab} \geq e^{-\beta+h} Z_{\emptyset b}$ , and completes the proof.  $\square$

### Proof of Lemma 3.5

We start by computing the probability that a particular sample  $\sigma^{(i)}$  is in  $A_U$ , or equivalently that  $\sigma_U = \mathbf{0}$ . Let  $W \subseteq V$  be any subset of nodes, and denote by  $x_W$  an assignment to the corresponding variables. Due to the antiferromagnetic nature of the interaction, the distribution (3.2) satisfies the monotonicity property  $\mathbb{P}(\sigma_a = 1 | \sigma_W = x_W) \leq \mathbb{P}(\sigma_a = 1 | \sigma_W = x_W, \sigma_b = 0)$  for any neighbor  $b \in N(a) \setminus W$ . This monotonicity together with Bayes' rule gives

$$\begin{aligned} \mathbb{P}(\sigma_U = \mathbf{0}) &= \prod_{i=1}^{|U|} \mathbb{P}(\sigma_{u_i} = 0 | \sigma_{u_1} = \dots = \sigma_{u_{i-1}} = 0) \geq \prod_{i=1}^{|U|} \mathbb{P}(\sigma_{u_i} = 0 | \sigma_{N(u_i)} = \mathbf{0}) \\ &= \prod_{i=1}^{|U|} [1 + e^{h_i}]^{-1}. \end{aligned}$$

Denoting the last displayed quantity by  $q$ , we see that the number of samples obtained,  $|A_U|$ , stochastically dominates a  $\text{Binom}(n, q)$  random variable. Hoeffding's inequality proves the lemma.  $\square$

#### Proof of Lemma 4.4

Calculating correlation relative to the uniform distribution  $U$  (see Equation (4.1)), we have for  $S \neq T$  with  $|S \cap T| = \lambda$

$$\begin{aligned} \left\langle \frac{p_S}{U} - 1, \frac{p_T}{U} - 1 \right\rangle_U &= \sum_{x \in \{-1, +1\}^p} 2^{-p} (2^p p_S(x) - 1)(2^p p_T(x) - 1) \\ &= \sum_{x \in \{-1, +1\}^p} 2^p p_S(x) p_T(x) - 1. \end{aligned} \quad (4.8)$$

Now

$$\begin{aligned} \sum_{x \in \{-1, +1\}^p} 2^p p_S(x) p_T(x) &= \frac{2^p}{Z^2} \sum_x \exp(c \cdot (\chi_S(x) + \chi_T(x))) \\ &= \frac{2^p \cdot 2^{p-2N+\lambda}}{Z^2} \sum_{x_{S \cap T}} \sum_{x_{S \Delta T}} \exp(c \cdot (\chi_S(x) + \chi_T(x))) \\ &\stackrel{(a)}{=} \frac{2^p \cdot 2^{p-2N+\lambda}}{Z^2} \sum_{x_{S \cap T}} 2^{2N-2\lambda} \cdot \frac{1}{4} \cdot (e^{2c} + e^{-2c} + 2) \\ &= \frac{2^{2p-2}}{Z^2} (e^c + e^{-c})^2 \stackrel{(b)}{=} 1. \end{aligned}$$

Step (a) follows from the fact that for any fixed  $x_{S \cap T}$ , half the assignments to  $x_{S \setminus T}$  result in  $\chi_S = 1$  and half  $\chi_S = -1$ , and similarly for  $x_{T \setminus S}$ ; step (b) is from the formula (4.3) for  $Z$ .

For the case  $S = T$ , we have

$$\begin{aligned} \sum_{x \in \{-1, +1\}^p} 2^p p_S(x) p_T(x) &= \frac{2^p}{Z^2} \sum_x \exp(c \cdot (\chi_S(x) + \chi_T(x))) \\ &= \frac{2^p \cdot 2^{p-1}}{Z^2} (e^{2c} + e^{-2c}) \\ &= \frac{2^{2p-2}}{Z^2} 2(e^c + e^{-c})^2 - \frac{4}{(e^c + e^{-c})^2} = 2 - \frac{4}{(e^c + e^{-c})^2}. \end{aligned}$$

Plugging this into (4.8) completes the proof.  $\square$
